# Supplementary material for: Semi-transparent perovskite solar cells: unveiling the trade-off between transparency and efficiency
Source: Royal Society of Chemistry journal article supplement (doi:10.1039/c8ta07318j), 2018-01-01
Supplement: c8ta07318j1.pdf [file c8ta07318j1.pdf]

## Supporting information

### **Semi-transparent perovskite solar cells: Unveiling the trade-off between transparency and efficiency**

Ligang Yuan, ‡<sup>a</sup> Zhaowei Wang, ‡<sup>a</sup> Ruomeng Duan,<sup>b</sup> Peng Huang,<sup>a</sup> Kaicheng Zhang,<sup>a</sup> Qiaoyun Chen,<sup>a</sup> Shenxi Min,<sup>a</sup> Nageh K. Allam,<sup>c</sup> Yi Zhou,<sup>\*a</sup> Bo Song,<sup>\*a</sup> Yongfang Li<sup>a,d</sup>

<sup>a</sup>Laboratory of Advanced Optoelectronic Materials, College of Chemistry, Chemical Engineering and Materials Science, Soochow University, Suzhou, 215123, P. R. China

<sup>b</sup>School of Environment and Civil Engineering, Dongguan University of Technology, Dongguan, 523808, P. R. China.

<sup>c</sup>Energy Materials Laboratory, School of Sciences and Engineering, The American University of Cairo, New Cairo 11835, Egypt.

<sup>d</sup>CAS Research/Education Center for Excellence in Molecular Sciences, CAS Key Laboratory of Organic Solids, Institute of Chemistry, Chinese Academy of Sciences, Beijing, 100190, China

\*Corresponding authors: E-mail: [yizhou@suda.edu.cn](mailto:yizhou@suda.edu.cn); [songbo@suda.edu.cn](mailto:songbo@suda.edu.cn)

‡ L. Yuan and Z. Wang contributed equally to this work.

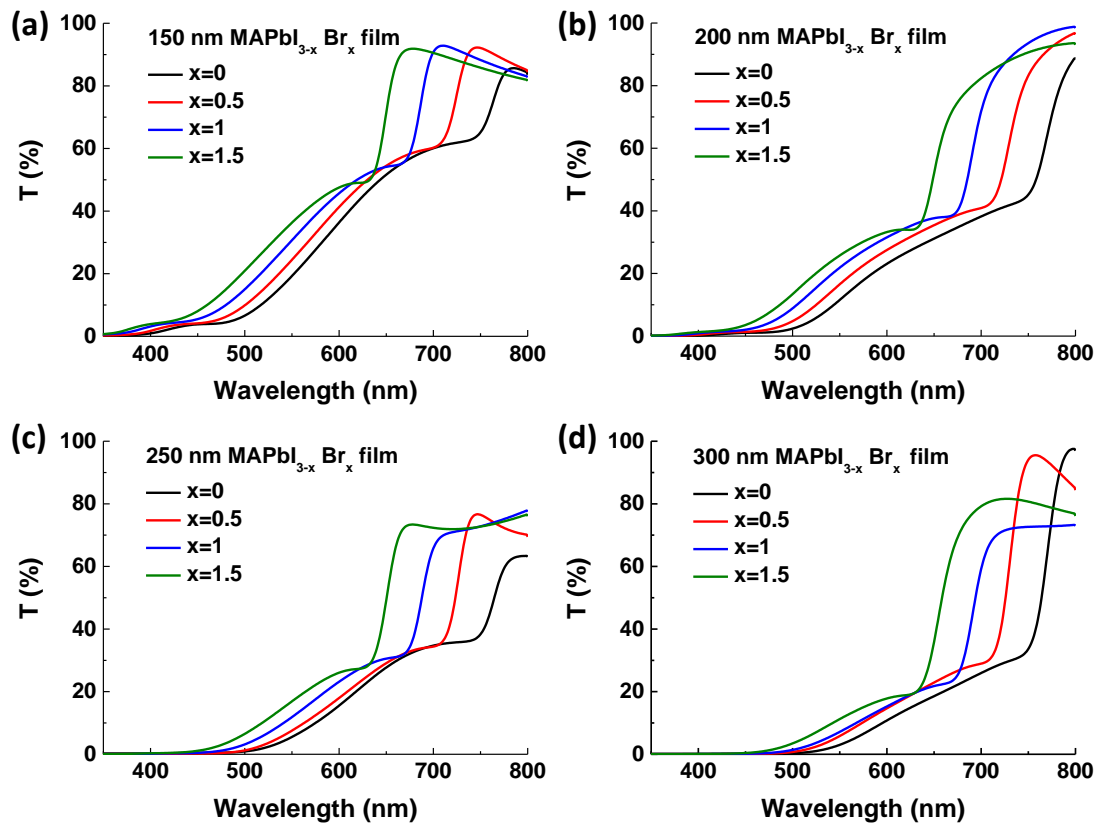

**Figure S1.** The transmittance spectra of MAPbI<sub>3-x</sub>Br<sub>x</sub> (x=0, 0.5, 1 and 1.5) films with different thicknesses, (a) 150 nm, (b) 200 nm, (c) 250 nm and (d) 300 nm.

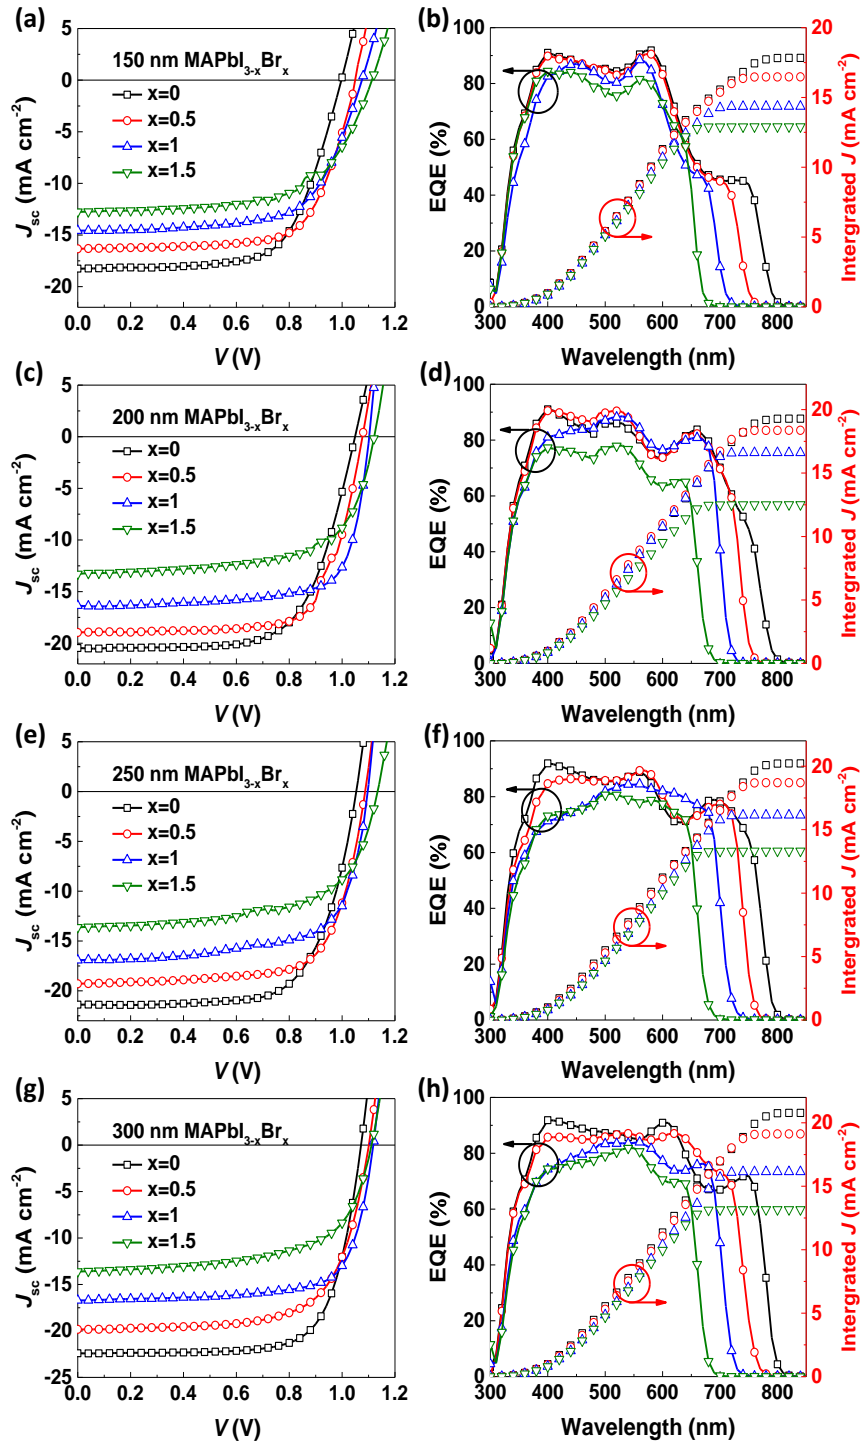

**Figure S2.** The  $J$ - $V$  and EQE curves of opaque Pero-SCs with different thicknesses of  $\text{MAPbI}_{3-x}\text{Br}_x$  ( $x=0, 0.5, 1$  and  $1.5$ ) films, (a),(b) 150 nm, (c), (d) 200 nm, (e),(f) 250 nm and (g),(h) 300 nm.

**Table S1.** Photovoltaic parameters of opaque Pero-SCs with different thicknesses of MAPbI<sub>3-x</sub>Br<sub>x</sub> (x=0, 0.5, 1 and 1.5).  
150 nm thickness of perovskite layer

| MAPbI <sub>3-x</sub> Br <sub>x</sub> | V <sub>oc</sub> (V) | J <sub>sc</sub> (mA cm <sup>-2</sup> ) | FF (%) | PCE (%) |
|--------------------------------------|---------------------|----------------------------------------|--------|---------|
| x=0                                  | 1.00                | 18.25                                  | 66.4   | 12.08   |
| x=0.5                                | 1.05                | 16.33                                  | 69.4   | 11.90   |
| x=1                                  | 1.08                | 14.58                                  | 65.8   | 10.30   |
| x=1.5                                | 1.11                | 12.75                                  | 62.2   | 8.80    |

200 nm thickness of perovskite layer

| MAPbI <sub>3-x</sub> Br <sub>x</sub> | V <sub>oc</sub> (V) | J <sub>sc</sub> (mA cm <sup>-2</sup> ) | FF (%) | PCE (%) |
|--------------------------------------|---------------------|----------------------------------------|--------|---------|
| x=0                                  | 1.05                | 20.47                                  | 67.0   | 14.39   |
| x=0.5                                | 1.07                | 18.56                                  | 71.7   | 14.23   |
| x=1                                  | 1.10                | 16.36                                  | 74.3   | 13.30   |
| x=1.5                                | 1.12                | 13.23                                  | 65.2   | 9.71    |

250 nm thickness of perovskite layer

| MAPbI <sub>3-x</sub> Br <sub>x</sub> | V <sub>oc</sub> (V) | J <sub>sc</sub> (mA cm <sup>-2</sup> ) | FF (%) | PCE (%) |
|--------------------------------------|---------------------|----------------------------------------|--------|---------|
| x=0                                  | 1.05                | 21.38                                  | 68.5   | 15.43   |
| x=0.5                                | 1.07                | 19.35                                  | 69.0   | 14.34   |
| x=1                                  | 1.09                | 16.59                                  | 70.8   | 12.70   |
| x=1.5                                | 1.13                | 13.62                                  | 62.0   | 9.58    |

300 nm thickness of perovskite layer

| MAPbI <sub>3-x</sub> Br <sub>x</sub> | V <sub>oc</sub> (V) | J <sub>sc</sub> (mA cm <sup>-2</sup> ) | FF (%) | PCE (%) |
|--------------------------------------|---------------------|----------------------------------------|--------|---------|
| x=0                                  | 1.07                | 22.40                                  | 73.0   | 17.53   |
| x=0.5                                | 1.10                | 19.83                                  | 68.1   | 14.88   |
| x=1                                  | 1.12                | 16.70                                  | 73.5   | 13.72   |
| x=1.5                                | 1.11                | 13.60                                  | 62.1   | 9.39    |

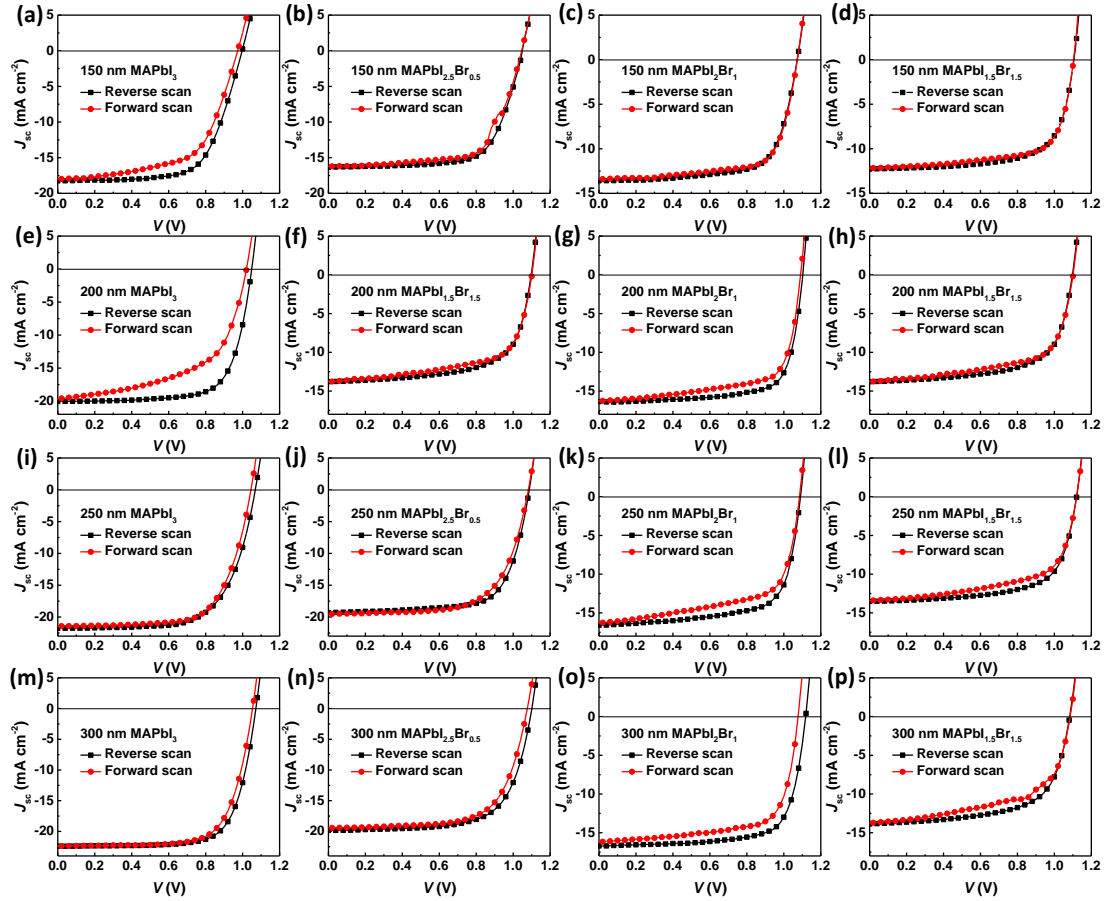

**Figure S3.**  $J$ - $V$  curves of opaque Pero-SCs with different thicknesses of  $\text{MAPb}_{3-x}\text{Br}_x$  ( $x=0, 0.5, 1$  and  $1.5$ ) film using reverse and forward scans under the illumination of AM 1.5G with power of  $100 \text{ mW cm}^{-2}$ . Scan range  $-0.2 - 1.2 \text{ V}$ , scan rate  $0.02 \text{ V s}^{-1}$ , delay time  $100 \text{ ms}$ .

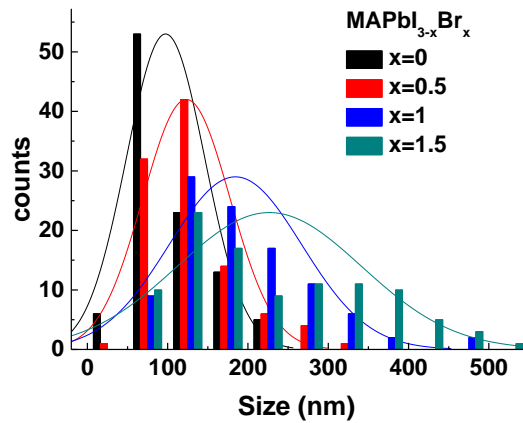

**Figure S4.** The analysis of grain size in the  $\text{MAPb}_{3-x}\text{Br}_x$  ( $x=0, 0.5, 1$  and  $1.5$ ) films.

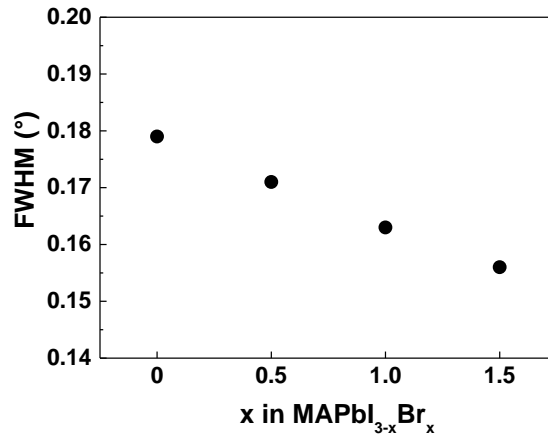

Figure S5. FWHM of the (110) diffraction versus the Br content of MAPbI<sub>3-x</sub>Br<sub>x</sub> films.

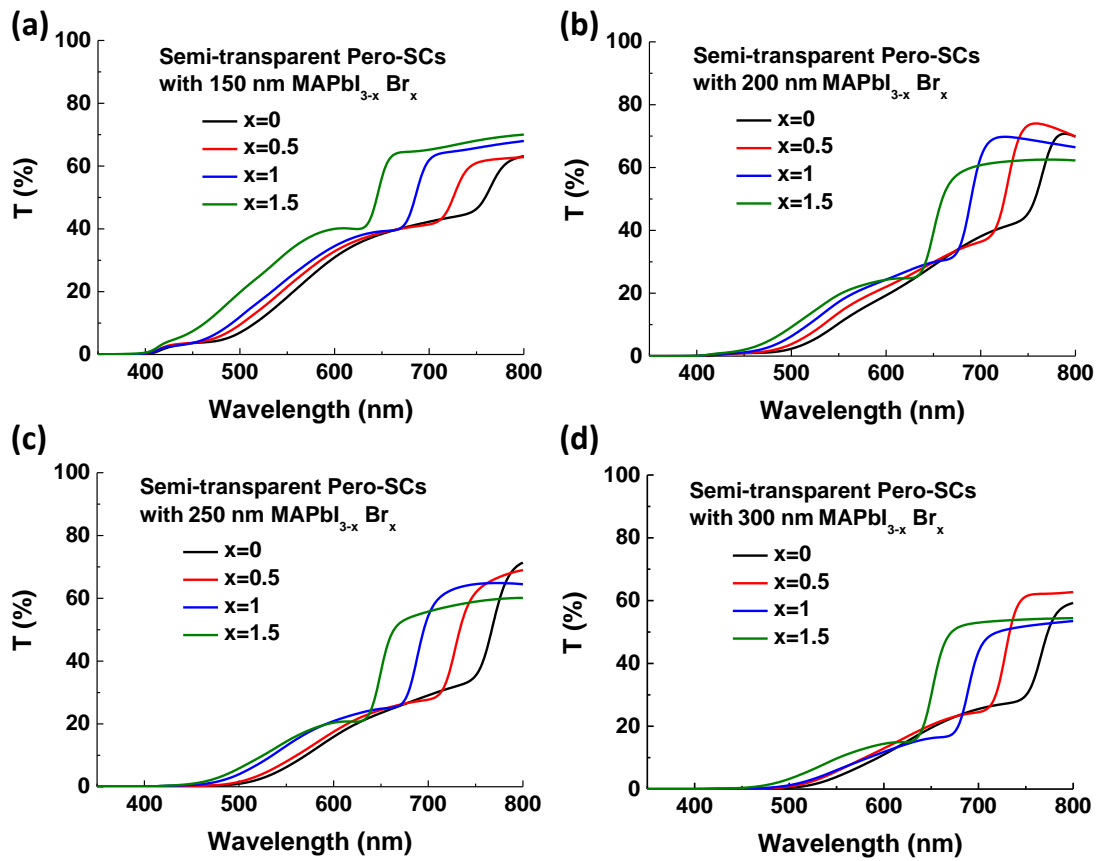

Figure S6. Transparent spectra of semi-transparent Pero-SCs with different thicknesses of MAPbI<sub>3-x</sub>Br<sub>x</sub> (x=0, 0.5, 1 and 1.5) film, (a) 150 nm, (b) 200 nm, (c) 250 nm and (d) 300 nm.

**Table S2.** Photovoltaic parameters of semi-transparent Pero-SCs with different thicknesses of MAPbI<sub>3-x</sub>Br<sub>x</sub> (x=0, 0.5,1 and 1.5) film.

150 nm thickness of perovskite layer

| MAPbI <sub>3-x</sub> Br <sub>x</sub> | V <sub>oc</sub> (V) | J <sub>sc</sub> (mA cm <sup>-2</sup> ) | FF (%) | PCE (%) |
|--------------------------------------|---------------------|----------------------------------------|--------|---------|
| x=0                                  | 1.01                | 15.53                                  | 69.0   | 10.83   |
| x=0.5                                | 1.05                | 13.58                                  | 68.3   | 9.73    |
| x=1                                  | 1.07                | 11.93                                  | 67.1   | 8.66    |
| x=1.5                                | 1.11                | 9.77                                   | 62.3   | 6.84    |

200 nm thickness of perovskite layer

| MAPbI <sub>3-x</sub> Br <sub>x</sub> | V <sub>oc</sub> (V) | J <sub>sc</sub> (mA cm <sup>-2</sup> ) | FF (%) | PCE (%) |
|--------------------------------------|---------------------|----------------------------------------|--------|---------|
| x=0                                  | 1.00                | 17.77                                  | 66.6   | 11.78   |
| x=0.5                                | 1.07                | 16.21                                  | 71.0   | 12.33   |
| x=1                                  | 1.10                | 14.17                                  | 70.7   | 11.03   |
| x=1.5                                | 1.11                | 11.85                                  | 69.9   | 9.18    |

250 nm thickness of perovskite layer

| MAPbI <sub>3-x</sub> Br <sub>x</sub> | V <sub>oc</sub> (V) | J <sub>sc</sub> (mA cm <sup>-2</sup> ) | FF (%) | PCE (%) |
|--------------------------------------|---------------------|----------------------------------------|--------|---------|
| x=0                                  | 1.00                | 19.53                                  | 67.6   | 13.24   |
| x=0.5                                | 1.08                | 17.12                                  | 70.7   | 13.10   |
| x=1                                  | 1.11                | 15.10                                  | 72.8   | 12.19   |
| x=1.5                                | 1.12                | 12.37                                  | 71.0   | 9.82    |

300 nm thickness of perovskite layer

| MAPbI <sub>3-x</sub> Br <sub>x</sub> | V <sub>oc</sub> (V) | J <sub>sc</sub> (mA cm <sup>-2</sup> ) | FF (%) | PCE (%) |
|--------------------------------------|---------------------|----------------------------------------|--------|---------|
| x=0                                  | 1.02                | 20.92                                  | 66.3   | 14.15   |
| x=0.5                                | 1.07                | 17.60                                  | 71.9   | 13.54   |
| x=1                                  | 1.11                | 15.62                                  | 70.2   | 12.26   |
| x=1.5                                | 1.13                | 12.79                                  | 69.7   | 10.03   |

**Table S3.** Photovoltaic parameters of semi-transparent Pero-SCs with different thicknesses of MAPbI<sub>3-x</sub>Br<sub>x</sub> (x=0, 0.5,1 and 1.5) film measured from Au side.

150 nm thickness of perovskite layer

| MAPbI <sub>3-x</sub> Br <sub>x</sub> | V <sub>oc</sub> (V) | J <sub>sc</sub> (mA cm <sup>-2</sup> ) | FF (%) | PCE (%) |
|--------------------------------------|---------------------|----------------------------------------|--------|---------|
| x=0                                  | 0.98                | 9.09                                   | 69.0   | 5.89    |
| x=0.5                                | 1.01                | 8.12                                   | 66.9   | 5.50    |
| x=1                                  | 1.04                | 7.11                                   | 66.6   | 4.94    |
| x=1.5                                | 1.05                | 5.36                                   | 58.9   | 3.41    |

200 nm thickness of perovskite layer

| MAPbI <sub>3-x</sub> Br <sub>x</sub> | V <sub>oc</sub> (V) | J <sub>sc</sub> (mA cm <sup>-2</sup> ) | FF (%) | PCE (%) |
|--------------------------------------|---------------------|----------------------------------------|--------|---------|
| x=0                                  | 0.98                | 10.82                                  | 70.9   | 7.56    |
| x=0.5                                | 1.04                | 9.75                                   | 72.9   | 7.38    |
| x=1                                  | 1.05                | 8.15                                   | 71.9   | 6.15    |
| x=1.5                                | 1.06                | 6.88                                   | 70.7   | 5.17    |

250 nm thickness of perovskite layer

| MAPbI <sub>3-x</sub> Br <sub>x</sub> | V <sub>oc</sub> (V) | J <sub>sc</sub> (mA cm <sup>-2</sup> ) | FF (%) | PCE (%) |
|--------------------------------------|---------------------|----------------------------------------|--------|---------|
| x=0                                  | 0.98                | 11.56                                  | 71.5   | 8.10    |
| x=0.5                                | 1.04                | 10.02                                  | 72.3   | 7.59    |
| x=1                                  | 1.07                | 9.13                                   | 73.7   | 7.20    |
| x=1.5                                | 1.06                | 7.26                                   | 71.9   | 5.56    |

300 nm thickness of perovskite layer

| MAPbI <sub>3-x</sub> Br <sub>x</sub> | V <sub>oc</sub> (V) | J <sub>sc</sub> (mA cm <sup>-2</sup> ) | FF (%) | PCE (%) |
|--------------------------------------|---------------------|----------------------------------------|--------|---------|
| x=0                                  | 0.96                | 13.42                                  | 72.7   | 9.31    |
| x=0.5                                | 1.04                | 10.99                                  | 71.2   | 8.29    |
| x=1                                  | 1.07                | 9.67                                   | 73.7   | 7.64    |
| x=1.5                                | 1.08                | 7.81                                   | 69.6   | 5.88    |



Table S4. Summary of semi-transparent Pero-SCs reported in the literature.

| Active materials                                                   | configuration                                                                                                                      | Active thickness (nm) | Wavelength (nm) | AVT (%) | PCE (%) | Ref. |
|--------------------------------------------------------------------|------------------------------------------------------------------------------------------------------------------------------------|-----------------------|-----------------|---------|---------|------|
| CH <sub>3</sub> NH <sub>3</sub> PbI <sub>3</sub> island            | Glass/FTO/ TiO <sub>2</sub> / CH <sub>3</sub> NH <sub>3</sub> PbI <sub>3</sub> island /spiro-OMeTAD/Au                             | -----                 | 370-740         | 30      | 3.5     | [1]  |
| CH <sub>3</sub> NH <sub>3</sub> PbI <sub>3</sub> island            | Glass/FTO/TiO <sub>2</sub> / CH <sub>3</sub> NH <sub>3</sub> PbI <sub>3</sub> island /Octadecyl-trichlorosilane/spiro-OMeTAD/Au    | -----                 | -----           | 38      | 6.1     | [2]  |
| CH <sub>3</sub> NH <sub>3</sub> PbI <sub>3</sub> island            | Glass/Compact TiO <sub>2</sub> / CH <sub>3</sub> NH <sub>3</sub> PbI <sub>3</sub> island/Spiro-OMeTAD/Au                           | -----                 | 370-740         | 34      | 6.4     | [3]  |
| NH <sub>2</sub> CH=NH <sub>2</sub> PbI <sub>3</sub> island         | Glass/Compact TiO <sub>2</sub> /NH <sub>2</sub> CH=NH <sub>2</sub> PbI <sub>3</sub> island/Spiro-OMeTAD/Au                         | -----                 | 370-740         | 28      | 5.2     | [3]  |
| CH <sub>3</sub> NH <sub>3</sub> PbI <sub>3</sub> island            | FTO/TiO <sub>2</sub> /PS interlayer/ CH <sub>3</sub> NH <sub>3</sub> PbI <sub>3</sub> island/PTAA/PEDOT:PSS                        | -----                 | -----           | 20.9    | 6.17    | [4]  |
| CH <sub>3</sub> NH <sub>3</sub> PbI <sub>3</sub> grid              | FTO glass/ compact TiO <sub>2</sub> /mesoporous TiO <sub>2</sub> /grid of CH <sub>3</sub> NH <sub>3</sub> PbI <sub>3</sub> /Au     | -----                 | 400-800         | 19      | 4.98    | [5]  |
| CH <sub>3</sub> NH <sub>3</sub> PbI <sub>3</sub>                   | Glass/ITO/PEDOT:PSS/CH <sub>3</sub> NH <sub>3</sub> PbI <sub>3</sub> /PCBM/Au/LiF                                                  | 40                    | 400-800         | 35      | 3.4     | [6]  |
|                                                                    |                                                                                                                                    | 100                   |                 | 29      | 6.4     |      |
|                                                                    |                                                                                                                                    | 180                   |                 | 22      | 7.3     |      |
|                                                                    |                                                                                                                                    | 280                   |                 | 10      | 7.73    |      |
| CH <sub>3</sub> NH <sub>3</sub> PbI <sub>3</sub>                   | Glass/CuSCN/CH <sub>3</sub> NH <sub>3</sub> PbI <sub>3</sub> /PCBM/Ag                                                              | 180                   | -----           | 25      | 10      | [7]  |
|                                                                    |                                                                                                                                    | 240                   |                 | 13      | 10.7    |      |
| CH <sub>3</sub> NH <sub>3</sub> PbI <sub>3-x</sub> Cl <sub>x</sub> | ITO glass/PEDOT:PSS/CH <sub>3</sub> NH <sub>3</sub> PbI <sub>3-x</sub> Cl <sub>x</sub> /PC <sub>60</sub> BM/ZnO/Ag NW              | 150                   | -----           | 28.4    | 8.49    | [8]  |
|                                                                    |                                                                                                                                    | 70                    |                 | 37      | 7.81    |      |
| CH <sub>3</sub> NH <sub>3</sub> PbI <sub>3-x</sub> Cl <sub>x</sub> | ITO glass/PEDOT:PSS/CH <sub>3</sub> NH <sub>3</sub> PbI <sub>3-x</sub> Cl <sub>x</sub> /PC <sub>60</sub> BM/ZnO/Ag NW              | 100                   | 370-740         | 29      | 9.55    | [9]  |
|                                                                    |                                                                                                                                    | 129                   |                 | 23      | 10.81   |      |
|                                                                    |                                                                                                                                    | 339                   |                 | 14      | 14      |      |
| CH <sub>3</sub> NH <sub>3</sub> PbI <sub>3</sub>                   | ITO Glass/PEDOT:PSS/CH <sub>3</sub> NH <sub>3</sub> PbI <sub>3</sub> /ALD ZnO/Ag NW/ALD Al <sub>2</sub> O <sub>3</sub> -coated PET | 220                   | 380-750         | 25.5    | 10.8    | [10] |
|                                                                    |                                                                                                                                    | 54                    |                 | 31      | 5.3     |      |
| CH <sub>3</sub> NH <sub>3</sub> PbI <sub>3</sub>                   | Glass/FTO/TiO <sub>2</sub> /CH <sub>3</sub> NH <sub>3</sub> PbI <sub>3</sub> /Spiro-OMeTAD/MoO <sub>3</sub> /Au/MoO <sub>3</sub>   | 107                   | 370-740         | 19      | 8.8     | [11] |
|                                                                    |                                                                                                                                    | 141                   |                 | 16      | 10.1    |      |
|                                                                    |                                                                                                                                    | 280                   |                 | 7       | 13.6    |      |
| CH <sub>3</sub> NH <sub>3</sub> PbI <sub>3</sub>                   | Glass/FTO/TiO <sub>2</sub> /CH <sub>3</sub> NH <sub>3</sub> PbI <sub>3</sub> /HTL with PEDOT/ITO glass                             | 5000 rpm              | -----           | 17.3    | 12.55   | [12] |
|                                                                    |                                                                                                                                    | 4500 rpm              |                 | 15.3    | 13.25   |      |
|                                                                    |                                                                                                                                    | 4000 rpm              |                 | 12.5    | 14.35   |      |
|                                                                    |                                                                                                                                    | 3500 rpm              |                 | 9.6     | 14.5    |      |

|                                                                    |                                                                                                                                                 |              |         |          |            |      |
|--------------------------------------------------------------------|-------------------------------------------------------------------------------------------------------------------------------------------------|--------------|---------|----------|------------|------|
|                                                                    |                                                                                                                                                 | 3000 rpm     |         | 7.8      | 15.1       |      |
|                                                                    |                                                                                                                                                 | 2500 rpm     |         | 6.3      | 15.8       |      |
| CH <sub>3</sub> NH <sub>3</sub> PbI <sub>3</sub>                   | Glass/FTO/ZnO/PCBM/CH <sub>3</sub> NH <sub>3</sub> PbI <sub>3</sub> /<br>Spiro-OMeTAD/MoO <sub>3</sub> /In <sub>2</sub> O <sub>3</sub> :H       | ----         | ----    | ----     | 14.5       | [13] |
| CH <sub>3</sub> NH <sub>3</sub> PbI <sub>3-x</sub> Cl <sub>x</sub> | Glass/Au/PEDOT: PSS/CH <sub>3</sub> NH <sub>3</sub> PbI <sub>3-x</sub> Cl <sub>x</sub> /<br>PCBM/DMD                                            | 240          | 500-800 | 15.9     | 8.67       | [14] |
| CH <sub>3</sub> NH <sub>3</sub> PbI <sub>3-x</sub> Cl <sub>x</sub> | TO/PEDOT:PSS/ CH <sub>3</sub> NH <sub>3</sub> PbI <sub>3-x</sub> Cl <sub>x</sub> :<br>PVP/CYTOP/PCBM/PEIE/Ag                                    | 90           | 400-800 | 34       | 5.36       | [15] |
| CH <sub>3</sub> NH <sub>3</sub> PbI <sub>3</sub>                   | glass/ITO/PEDOT:PSS/CH <sub>3</sub> NH <sub>3</sub> PbI <sub>3</sub> /P<br>CBM/C <sub>60</sub> /Al                                              | 150<br>110   | 400-800 | 29<br>34 | 9.4<br>8.2 | [16] |
| CH <sub>3</sub> NH <sub>3</sub> PbI <sub>3-x</sub> Cl <sub>x</sub> | Glass/FTO/compact TiO <sub>2</sub> /SiO <sub>2</sub> HC/<br>CH <sub>3</sub> NH <sub>3</sub> PbI <sub>3-x</sub> Cl <sub>x</sub> /Spiro-OMETAD/Ag | ----         | 380-780 | 28       | 9.5        | [17] |
| CH <sub>3</sub> NH <sub>3</sub> PbI <sub>3</sub>                   | FTO/TiO <sub>2</sub> /PCBM/ CH <sub>3</sub> NH <sub>3</sub> PbI <sub>3</sub> /Sprio-<br>OMeTAD/PEDOT:PSS                                        | 100          | ----    | 23       | 8.23       | [18] |
| CH <sub>3</sub> NH <sub>3</sub> PbI <sub>3</sub>                   | Glass/ITO/PEDOT:PSS/CH <sub>3</sub> NH <sub>3</sub> PbI <sub>3</sub> /P<br>CBM/Au                                                               | 150<br>----- | 370-740 | 18<br>3  | 9.1<br>12  | [19] |

## References

- (1) G. E. Eperon, V. M. Burlakov, Alain Goriely, Henry J. Snaith, *ACS nano* **2014**, *8*, 591–598.
- (2) M. T. Hörantner, P. K. Nayak, S. Mukhopadhyay, K. Wojciechowski, C. Beck, D. McMeekin, B. Kamino, G. E. Eperon, H. J. Snaith, *Adv. Mater. Interfaces* **2016**, *3*, 1500837.
- (3) G. E. Eperon, D. Bryant, J. Troughton, S. D. Stranks, M. B. Johnston, T. Watson, D. A. Worsley, H. J. Snaith, *J Phys. Chem. Lett.* **2015**, *6*, 129-138.
- (4) J. H. Heo, M. H. Jang, M. H. Lee, H. J. Han, M. G. Kang, M. L. Lee, S. H. Im, *J. Mater. Chem. A* **2016**, *4*, 16324-16329.
- (5) S. Aharon, M. Layani, B.-E. Cohen, E. Shukrun, S. Magdassi, L. Etgar, *Adv. Mater. Interfaces* **2015**, *2*, 1500118.
- (6) C. Roldán-Carmona, O. Malinkiewicz, R. Betancur, G. Longo, C. Momblona, F. Jaramillo, L. Camacho, H. J. Bolink, *Energy Environ. Sci.* **2014**, *7*, 2968.
- (7) J. W. Jung, C.-C. Chueh, A. K. Y. Jen, *Adv. Energy Mater.* **2015**, *5*, 1500486.
- (8) F. Guo, H. Azimi, Y. Hou, T. Przybilla, M. Hu, C. Bronnbauer, S. Langner, E. Spiecker, K. Forberich, C. J. Brabec, *Nanoscale* **2015**, *7*, 1642-1649.
- (9) C. O. Ramírez Quiroz, I. Levchuk, C. Bronnbauer, M. Salvador, K. Forberich, T. Heumüller, Y. Hou, P. Schweizer, E. Spiecker, C. J. Brabec, *J. Mater. Chem. A* **2015**, *3*, 24071-24081.
- (10) C.-Y. Chang, K.-T. Lee, W.-K. Huang, H.-Y. Siao, Y.-C. Chang, *Chem. Mater.* **2015**, *27*, 5122-5130.
- (11) E. Della Gaspera, Y. Peng, Q. Hou, L. Spiccia, U. Bach, J. J. Jasieniak, Y.-B. Cheng, *Nano Energy* **2015**, *13*, 249-257.
- (12) J. H. Heo, H. J. Han, M. Lee, M. Song, D. H. Kim, S. H. Im, *Energy Environ. Sci.* **2015**, *8*, 2922-2927.
- (13) F. Fu, T. Feurer, T. Jäger, E. Avancini, B. Bissig, S. Yoon, S. Buecheler, A. N. Tiwari, *Nat. Commun.* **2015**, *6*, 8932.
- (14) X.-L. Ou, M. Xu, J. Feng, H.-B. Sun, *Sol. Energ. Mat. Sol. C* **2016**, *157*, 660-665.
- (15) Y. Guo, K. Shoyama, W. Sato, E. Nakamura, *Adv. Energy Mater.* **2016**, *6*, 1502317.
- (16) S. Bag, M. F. Durstock, *Nano Energy* **2016**, *30*, 542-548.
- (17) M. T. Hörantner, W. Zhang, M. Saliba, K. Wojciechowski, H. J. Snaith, *Energy Environ. Sci.* **2015**, *8*,

2041-2047.

(18) S. Xiao, H. Chen, F. Jiang, Y. Bai, Z. Zhu, T. Zhang, X. Zheng, G. Qian, C. Hu, Y. Zhou, Y. Qu, S. Yang, *Adv. Mater. Interfaces* **2016**, *3*, 1600484.

(19) C. Li, J. Sleppy, N. Dhasmana, M. Soliman, L. Tetard, J. Thomas, *J. Mater. Chem. A* **2016**, *4*, 11648-11655.
